# Supplementary material
Source: publisher site journal article supplement (https://www.dovepress.com/article/348714)
Supplement: Supplementary file 1 [file get_supplementary_file.php]

Appendix Table A-1 Fried Frailty Scale Items

| **Criteria** | **Measure** | **Fried Original Cutoff (if applicable)** | **HRS Measure/Cutoff** |
| --- | --- | --- | --- |
| Unintentional weight loss | Lost >10 lbs last year unintentionally |  | *Low BMI used by BODE*  *BMI <21* |
| Weakness | Grip strength (kg): lowest 20% by gender, body mass index  [HRS uses Smedley spring-type hand dynamometer] | Men  BMI <24 🡪 <29  BMI 24.1–26 🡪 <30  BMI 26.1–28 🡪 <30  BMI >28 🡪 <32  Women  BMI <23 🡪 <17  BMI 23.1–26🡪 <17.3  BMI 26.1–29 🡪 <18  BMI >29 🡪 <21 | *Men (age 50-64; age >65)*  *BMI <26.3 🡪 <34.5; <25.7 🡪 26.5*  *BMI 26.3–29.5 🡪 <36.0; 25.7–28.7 🡪 29.0*  *BMI 29.5–33.4 🡪 <37.5; 28.7–32.3 🡪 29.0*  *BMI >33.4 🡪 <36.5; >32.3 🡪 30.0*  *Women*  *BMI <25.8 🡪 <21.5; <24.7 🡪 16.0*  *BMI 25.8–30.2🡪 <22.0; 24.7–28.4 🡪 17.0*  *BMI 30.2–35.5🡪 <22.5; 28.4–32.9 🡪 18.0*  *BMI >35.5 🡪 <22.5; >32.9 🡪 19.0* |
| Poor endurance; exhaustion | “Exhaustion” (self-report) | from the CES-D depression scale  “How often in the last week did you feel this way?” 0, rarely or none of the time (<1 day); 1, some or a little of the time (1–2 days); 2, a moderate amount of the time (3–4 days); or 3, most of the time.  *Based on two statements:*  a) I felt that everything I did was an effort;  b) I could not get going.  Subjects answering “2” or “3” to either of these questions are categorized as frail by the exhaustion criterion. | *From the CES-D scale:*  *“Please tell me if each of the following was true for you much of the time during the past week. (Yes or No) Much of the time during the past week:*  *a) You felt that everything you did was an effort.*  *b) You could not get going.*  *Subjects answer “Yes” to both questions categorized as frail.[[1]](#footnote-1)* |
| Slowness | Walking time / 15 feet: slowest 20% (by gender, height) | Walking time / 15 feet  Men  Height <173 cm (68.1 in) 🡪 >7 seconds  Height >173 cm (68.1 in) 🡪 >6 seconds  Women  Height <159 cm (62.6 in) 🡪 >7 seconds  Height >159 cm (62.6 in) 🡪 >6 seconds | *Walking time / 12 feet*  *(Only administered to respondents age 65 or older):*  *Men*  *Height <68.0 in 🡪 >4.8 sec*  *Height >68.0 in 🡪 >4.3 sec*  *Women*  *Height <62.5 in 🡪 >5.4 sec*  *Height >62.5 in 🡪 >4.9 sec*  *Otherwise if unable to do the walk test, considered slow.*  *Also, if reported Difficulty with walking one block, then flagged being slow for this criteria (also for those age 50-64)* |
| Low activity | Kcals/week: lowest 20% (by gender) | Based on the short version of the Minnesota Leisure Time Activity questionnaire, asking about walking, chores (moderately strenuous), mowing  the lawn, raking, gardening, hiking, jogging, biking, exercise cycling, dancing, aerobics, bowling, golf, singles tennis, doubles tennis, racquetball, calisthenics, swimming. Kcals per week expended are calculated using standardized algorithm. This variable is stratified by gender.  Men: Those with Kcals of physical activity per week <383 are frail.  Women: Those with Kcals per week <270 are frail. | *Weighted method for HRS item: (1)*  *“How often do you take part in sports or activities that are… [Vigorous]; [Moderate]; [Mild]”?*  *1) Hardly ever or never*  *2) One to three times a month*  *3) Once a week*  *4) More than once a week*  *5) Every day*  *Weights for each response for Vigorous, Moderate, Mild:*  *1) 0, 0, 0*  *2) 2, 2, 0.5*  *3) 4, 2, 1*  *4) 16, 8, 4*  *5) 28, 14, 7*  *Score calculated for sum of responses for 3 questions.*  *Respondents met criterion if in lowest quintile of physical activity by gender (age 50-64 <4.0; age >65 <2.0)* |

Appendix Table A-2 Enhanced FI-CGA Criteria

| **Enhanced FI-CGA** | | | | **HRS Measure** | **Notes – HRS** |
| --- | --- | --- | --- | --- | --- |
| **Criteria** | **Fitness & FI*** | **FI-CGA** |  | |  |
| **Self-rated health** | ✓ | ✓ | *Would you say your health is excellent, very good, good, fair, or poor?* | | *response of poor* |
| **Cognition** |  |  |  | |  |
| Dementia | ✓ | ✓ | *27 item cognitive test* | | *Dementia (0-6)* |
| Cognitive problem | ✓ |  | *Has a doctor ever told you that you have a memory-related disease?* | |  |
| **Emotional** |  |  |  | |  |
| Depression | ✓ | ✓ | *CES-D8 depression scale* | | *>3 (max score = 8)* |
| Fatigue | ✓ | ✓ | *Exhaustion item used for Fried* | |  |
| Bereavement |  | ✓ | *Recently widowed (last 2 years)* | |  |
| Less activity (home / work) | ✓ |  | *Sedentary behavior item used for Fried* | |  |
| **Poor/disrupted sleep** |  | ✓ | *Response of “Most of the time” to “How often do you have trouble with waking up during the night?” or Response of “Rarely or Never” to “How often do you feel really rested when you wake up in the morning?”* | |  |
| **Communication** |  |  |  | |  |
| Vision problem | ✓ | ✓ | *How good is your eyesight for seeing things up close, like reading ordinary newspaper print, using glasses or corrective lens as usual? (Is it excellent, very good, good, fair, or poor?)* | | *Impaired = poor* |
| Hearing problem | ✓ | ✓ | *Is your hearing excellent, very good, good, fair, or poor using a hearing aid as usual?* | | *Impaired = poor* |
| **Strength** |  |  |  | |  |
| Grip strength | ✓ | ✓ | *Grip as assessed for Fried – or “How would you rate your hand strength? Would you say it is very strong, somewhat strong, somewhat weak, or very weak?“* | | *Lowest 20% or response of very weak* |
| Upper body strength | ✓ | ✓ | *(Because of a health problem do you have any difficulty) with lifting or carrying weights over 10 pounds, like a heavy bag of groceries* | |  |
| Lower body strength |  | ✓ | *(Because of a health problem do you have any difficulty) with getting up from a chair after sitting for long periods?* | |  |
| **Mobility (difficulty/help)** |  |  |  | |  |
| Getting in/out bed |  | ✓ | *Self-report (ADL)* | |  |
| Walking across a room | ✓ | ✓ | *Self-report (ADL)* | |  |
| Walking aid |  | ✓ | *Do you ever use equipment or devices such as a cane, walker or wheelchair when crossing a room?* | |  |
| **Balance** |  |  |  | |  |
| Balance |  | ✓ | *1) How often do you have difficulty with balance? Would you say often, sometimes, rarely, or never? OR 2) balance physical measures (semi-tandem, side-by-side)* | | *1) Response of “often” or 2) Not safe to do* |
| Falls |  | ✓ | *How many times have you fallen in the last two years? (any vs none)* | | *Only asked of respondents >65* |
| Elimination |  |  |  | |  |
| Incontinence | ✓ | ✓ | *“During the last 12 months, have you lost any amount of urine beyond your control?”* | |  |
| **Nutrition** |  |  |  | |  |
| Underweight | ✓ | ✓ | *Low BMI (same as for Fried)* | |  |
| **ADLs (difficulty/need help)** |  |  |  | |  |
| eating | ✓ | ✓ | *Self-report* | |  |
| bathing | ✓ | ✓ | *Self-report* | |  |
| dressing | ✓ | ✓ | *Self-report* | |  |
| using bathroom | ✓ | ✓ | *Self-report* | |  |
| **IADLS (problems with …)** |  |  |  | |  |
| cooking/preparing meals | ✓ | ✓ | *Self-report* | |  |
| shopping for necessities | ✓ | ✓ | *Self-report* | | *Pertains to groceries* |
| taking medication |  | ✓ | *Self-report* | |  |
| banking |  | ✓ | *Self-report* | |  |
| **Dexterity problem** | ✓ |  | *Difficulty with picking up a dime* | |  |
| **Chronic conditions[[2]](#footnote-2)** |  |  |  | |  |
| Hypertension | ✓ | ✓ | *Self-report* | |  |
| COPD |  | ✓ |  | | *Used to stratify population* |
| TIA/Stroke |  | ✓ | *Self-report* | |  |
| Effects of a stroke | ✓ |  | *Self-report* | |  |
| Angina/MI | ✓ | ✓ | *Captured as “heart disease” – “Has a doctor ever told you that you a heart attack, coronary heart disease, angina, congestive heart failure, or other heart problems?"* | |  |
| CHF | ✓ | ✓ |  |
| Diabetes | ✓ | ✓ | *Self-report* | |  |
| Cancer | ✓ | ✓ | *Self-report* | |  |
| Alcohol excess |  | ✓ | *If respondent consumes alcohol, positive response to question “In the last three months, on how many days have you had four or more drinks on one occasion?” or report >4 for question “In the last three months, on the days you drink, about how many drinks do you have?”* | |  |
| Arthritis or rheumatism | ✓ | ✓ | *Self-report* | |  |
| Body pain prevents activities | ✓ |  | *Self-report* | |  |

ADL, Instrumental Activities of Daily Living; IADL, Instrumental Activities of Daily Living

* Included by Rockwood in fitness/frailty assessment(2)

Appendix Table A-3 Modified BODE Criteria

| **Criteria** | **Measure** | **HRS Measure/Cutoff** |
| --- | --- | --- |
| Low BMI | BMI <21 (same as original BODE) | *BMI <21🡪 2 pts* |
| % predicted PEF | Best of 3 PEF test measures[[3]](#footnote-3) - % predicted based on previously published formulas (3) | *%Pred PEF>=0.65 🡪 0 pts*  *%Pred PEF 0.50 - <0.65 🡪 1 pt*  *%Pred PEF 0.36 - <0.50 🡪 2 pts*  *%Pred PEF <0.36 🡪 3 pts* |
| Shortness of breath | Have you had any of the following persistent or troublesome problems? Shortness of breath while awake?  OR  How often do you become short of breath while awake? Would you say often, sometimes, rarely, or never? Do not include periods of exercise.  (Often, sometimes used.) | *Shortness of breath 🡪 1 pt* |
| Exercise | Difficulty lifting/ carrying over 10 lbs. or  Difficulty walking one block | *Lifting/carrying 10 lbs 🡪 2 pts*  *Walking one block 🡪 1 pt*  *Both items are considered, but only the higher # of pts included.* |

PEF, peak expiratory flow

Appendix Table B-1 Survey Participants for Analyses

| Survey Participants with Physical Measures | | | | |  | Survey Participants with Physical Measures and Without Missing Information* | | | | |  | Survey Participants with Physical Measures and Without Missing Information and Without Non-Zero Physical Measure Weights* | | | | |
| --- | --- | --- | --- | --- | --- | --- | --- | --- | --- | --- | --- | --- | --- | --- | --- | --- |
| Age 50 – 64 | | | | |  | Age 50 – 64 | | | | |  | Age 50 – 64 | | | | |
| **Year** | **Total** | **Non COPD** | **COPD** | ***COPD %*** |  | **Year** | **Total** | **Non COPD** | **COPD** | ***COPD %*** |  | **Year** | **Total** | **Non COPD** | **COPD** | ***COPD %*** |
| *2016* | 4103 | 3762 | 341 | *8.3%* |  | *2016* | 4008 | 3672 | 336 | *8.4%* |  | *2016* | 3931 | 3602 | 329 | *8.4%* |
| *2014* | 3426 | 3118 | 308 | *9.0%* |  | *2014* | 3345 | 3050 | 295 | *8.8%* |  | *2014* | 3028 | 2752 | 276 | *9.1%* |
| *2012* | 3887 | 3588 | 299 | *7.7%* |  | *2012* | 3795 | 3504 | 291 | *7.7%* |  | *2012* | 3564 | 3290 | 274 | *7.7%* |
| *2010* | 4207 | 3885 | 322 | *7.7%* |  | *2010* | 4141 | 3822 | 319 | *7.7%* |  | *2010* | 4055 | 3739 | 316 | *7.8%* |
| *2008* | 2148 | 1965 | 183 | *8.5%* |  | *2008* | 2124 | 1945 | 179 | *8.4%* |  | *2008* | 1870 | 1709 | 161 | *8.6%* |
| *2006* | 2750 | 2546 | 204 | *7.4%* |  | *2006* | 2717 | 2515 | 202 | *7.4%* |  | *2006* | 2531 | 2342 | 189 | *7.5%* |
| Age 65 and older | | | | |  | Age 65 and older | | | | |  | Age 65 and older | | | | |
| **Year** | **Total** | **Non COPD** | **COPD** | ***COPD %*** |  | **Year** | **Total** | **Non COPD** | **COPD** | ***COPD %*** |  | **Year** | **Total** | **Non COPD** | **COPD** | ***COPD %*** |
| *2016* | 3711 | 3249 | 462 | *12.4%* |  | *2016* | 3593 | 3143 | 450 | *12.5%* |  | *2016* | 3593 | 3143 | 450 | *12.5%* |
| *2014* | 4261 | 3738 | 523 | *12.3%* |  | *2014* | 4150 | 3641 | 509 | *12.3%* |  | *2014* | 4150 | 3641 | 509 | *12.3%* |
| *2012* | 4091 | 3577 | 514 | *12.6%* |  | *2012* | 3976 | 3478 | 498 | *12.5%* |  | *2012* | 3975 | 3478 | 497 | *12.5%* |
| *2010* | 4171 | 3671 | 500 | *12.0%* |  | *2010* | 4080 | 3590 | 490 | *12.0%* |  | *2010* | 4078 | 3588 | 490 | *12.0%* |
| *2008* | 4285 | 3773 | 512 | *11.9%* |  | *2008* | 4213 | 3706 | 507 | *12.0%* |  | *2008* | 4169 | 3666 | 503 | *12.1%* |
| *2006* | 4304 | 3835 | 469 | *10.9%* |  | *2006* | 4229 | 3771 | 458 | *10.8%* |  | *2006* | 4197 | 3743 | 454 | *10.8%* |

* Respondents missing information for these items were excluded: COPD, sex, race, components of Fried, proxy BODE measure, Rockwood frailty/fitness index or Enhanced FI-CGA. Respondents without weight values >0 were also excluded.

Overall, 43,141 person-year observations were included in prevalence analyses. Data represented 23,082 unique individuals: 9,045 (39.2%) with 1 survey year of responses, 8,015 (34.7%) with 2 survey years, and 6,022 (26.1%) with 3 survey years.

Appendix Table B-2 Weighted Prevalence 2006-2016, by Sex and Age Group

|  | **Women** | | | | | | | | **Men** | | | | | | | |
| --- | --- | --- | --- | --- | --- | --- | --- | --- | --- | --- | --- | --- | --- | --- | --- | --- |
|  | **Age 50-64** | | | | **Age >65** | | | | **Age 50-64** | | | | **Age >65** | | | |
|  | **Non-COPD**  **(N=9799)** | | **COPD**  **(N=1036)** | | **Non-COPD**  **(N=12174)** | | **COPD**  **(N=1740)** | | **Non-COPD**  **(N=7635)** | | **COPD**  **(N=509)** | | **Non-COPD**  **(N =9085)** | | **COPD**  **(N=1163)** | |
| **categories** | **%** | **95% CI** | **%** | **95% CI** | **%** | **95% CI** | **%** | **95% CI** | **%** | **95% CI** | **%** | **95% CI** | **%** | **95% CI** | **%** | **95% CI** |
| **Fried Frailty** |  |  |  |  |  |  |  |  |  |  |  |  |  |  |  |  |
| **Robust (0)** | 56.9 | (55.3, 58.6) | 29.8 | (25.0, 34.6) | 44.6 | (43.0, 46.2) | 26.5 | (24.2, 28.7) | 33.5 | (31.4, 35.6) | 22.6 | (17.6, 27.7) | 53.9 | (52.3, 55.5) | 30.8 | (26.9, 34.7) |
| **Prefrail (1-2)** | 38.1 | (36.7, 39.6) | 49.2 | (45.0, 53.4) | 44.5 | (43.2, 45.8) | 47.8 | (44.5, 51.1) | 58.7 | (57.0, 60.5) | 55.0 | (49.8, 60.2) | 38.5 | (37.0, 39.9) | 50.0 | (46.1, 53.8) |
| **Frail (3-5)** | **4.9** | **(4.1, 5.7)** | **21.0** | **(17.5, 24.4)** | **10.9** | **(10.1, 11.7)** | **25.8** | **(22.6, 28.9)** | **7.8** | **(6.7, 8.9)** | **22.3** | **(17.7, 27.0)** | **7.6** | **(7.0, 8.2)** | **19.2** | **(17.0, 21.5)** |
| **Enhanced FI-CGA** | | | | | | | | | | | | | | | | | |
| **Relatively Fit** | 26.4 | (24.9, 27.9) | 4.5 | (2.9, 6.0) | 10.5 | (9.6, 11.3) | 2.2 | (1.4, 3.1) | 29.8 | (28.0, 31.5) | 7.9 | (4.5, 11.2) | 14.1 | (13.1, 15.1) | 3.2 | (1.9, 4.5) |
| **Less Fit** | 31.0 | (29.7, 32.2) | 15.0 | (11.5, 18.6) | 25.6 | (24.5, 26.7) | 12.8 | (11.2, 14.3) | 33.6 | (32.0, 35.1) | 14.6 | (10.8, 18.3) | 31.7 | (30.3, 33.0) | 16.3 | (14.1, 18.5) |
| **Least Fit** | 27.8 | (26.6, 29.1) | 28.0 | (23.9, 32.2) | 37.4 | (36.3, 38.5) | 34.0 | (30.8, 37.1) | 25.2 | (23.9, 26.4) | 37.9 | (32.9, 42.9) | 36.7 | (35.4, 37.9) | 42.0 | (38.4, 45.6) |
| **Frail** | 13.0 | (11.9, 14.2) | 40.1 | (35.6, 44.6) | 22.7 | (21.5, 23.8) | 38.6 | (35.8, 41.3) | 9.9 | (8.9, 11.0) | 29.2 | (24.1, 34.3) | 15.3 | (14.4, 16.2) | 31.5 | (27.7, 35.2) |
| **Most Frail** | **1.8** | **(1.3, 2.3)** | **12.4** | **(9.2, 15.5)** | **3.8** | **(3.2, 4.4)** | **12.5** | **(10.2, 14.7)** | **1.6** | **(1.2, 1.9)** | **10.5** | **(7.9, 13.0)** | **2.3** | **(1.8, 2.8)** | **7.1** | **(5.0, 9.2)** |
| **Proxy BODE Score** | | | | | | | | | | | | | | | | | |
| **0-1** | 80.9 | (79.4, 82.3) | 38.9 | (34.5, 43.3) | 68.4 | (67.3, 69.5) | 34.5 | (31.7, 37.2) | 86.5 | (85.3, 87.7) | 49.4 | (43.4, 55.4) | 79.9 | (78.8, 81.0) | 39.7 | (35.4, 44.0) |
| **2-3** | 17.2 | (16.0, 18.4) | 41.9 | (37.1, 46.8) | 26.6 | (25.5, 27.8) | 42.7 | (39.7, 45.7) | 11.5 | (10.4, 12.7) | 29.7 | (23.9, 35.5) | 17.0 | (16.0, 17.9) | 35.4 | (31.0, 39.8) |
| **4 or higher** | **1.9** | **(1.5, 2.4)** | **19.2** | **(15.1, 23.3)** | **5.0** | **(4.6, 5.4)** | **22.8** | **(20.0, 25.7)** | **2.0** | **(1.5, 2.4)** | **21.0** | **(16.1, 25.8)** | **3.2** | **(2.8, 3.6)** | **24.9** | **(20.9, 28.9)** |
| **Cognition (27-item)** | | | | | | | | | | | | | | | | | |
| **Normal** | 91.0 | (90.0, 92.1) | 82.5 | (78.8, 86.2) | 77.1 | (75.6, 78.5) | 71.8 | (68.4, 75.2) | 89.5 | (88.5, 90.6) | 83.1 | (79.6, 86.7) | 77.9 | (76.5, 79.2) | 71.3 | (68.0, 74.6) |
| **Mild Impairment** | 7.9 | (7.0, 8.7) | 16.1 | (12.5, 19.7) | 17.7 | (16.5, 19.0) | 22.6 | (19.7, 25.6) | 9.1 | (8.3, 9.9) | 14.4 | (11.6, 17.3) | 17.9 | (16.7, 19.1) | 23.2 | (20.6, 25.8) |
| **Dementia** | **1.1** | **(0.8, 1.4)** | **1.4** | **(0.5, 2.2)** | **5.2** | **(4.7, 5.7)** | **5.6** | **(4.0, 7.2)** | **1.4** | **(1.0, 1.7)** | **2.4** | **(0.8, 4.1)** | **4.3** | **(3.8, 4.8)** | **5.5** | **(4.0, 7.0)** |

Appendix Table B-3 Matched Respondents, Demographics, Surveys 2006-2016, Percentage (95% Confidence Interval)

|  | **Age 50-64** | | **Age 65 and older** | |
| --- | --- | --- | --- | --- |
|  | **Non-COPD**  **(N = 4,635)** | **COPD**  **(N = 1,545)** | **Non-COPD**  **(N = 8,701)** | **COPD**  **(N = 2,901)** |
| Age, mean | 57.9 (57.8, 58.0) | 58.3 (58.1, 58.5) | 75.1 (75.0, 75.2) | 75.1 (74.9,75.4)* |
| Male* | 32.9 (32.1, 33.8) | 32.9 (30.7, 35.2) | 40.0 (39.5, 40.6) | 40.1 (38.4, 41.8) |
| Race* |  |  |  |  |
| White/Caucasian | 63.7 (62.9, 64.5) | 63.7 (61.4, 66.0) | 85.2 (84.8, 85.6) | 85.2 (83.9, 86.4) |
| Black/African American | 24.4 (23.4, 25.4) | 26.3 (24.2, 28.5) | 11.5 (11.0, 12.0) | 11.4 (10.3, 12.5) |
| Other | 11.9 (11.0, 12.7) | 10.0 (8.5, 11.4) | 3.3 (2.9, 3.6) | 3.4 (2.8, 4.1) |
| Ethnicity |  |  |  |  |
| Non-Hispanic | 82.8 (81.7, 83.9) | 88.8 (87.3, 90.3) | 91.5 (91.0, 92.1) | 95.2 (94.4, 95.9) |
| Mexican | 10.3 (9.4, 11.2) | 5.0 (3.9, 6.0) | 5.1 (4.7, 5.6) | 2.5 (2.0, 3.1) |
| Other | 6.7 (6.0, 7.4) | 6.0 (4.9, 7.2) | 3.1 (2.8, 3.5) | 2.2 (1.7, 2.7) |
| Unknown | 0.0 (0.0, 0.1) | 0.1 (0.0, 0.2) | 0.2 (0.1, 0.3) | 0.1 (0.0, 0.3) |
| Education |  |  |  |  |
| No degree | 13.4 (12.4, 14.3) | 22.9 (20.9, 24.9) | 18.8 (18.0, 19.6) | 25.7 (24.2, 27.3) |
| GED / High school diploma | 48.8 (47.4, 50.3) | 56.2 (53.8, 58.6) | 54.8 (53.8, 55.8) | 56.2 (54.4, 57.9) |
| Some college | 37.8 (36.4, 39.2) | 20.9 (18.9, 22.9) | 26.4 (25.5, 27.3) | 18.1 (16.8, 19.4) |
| Living arrangements |  |  |  |  |
| Married/With partner | 67.1 (65.8, 68.4) | 53.6 (51.2, 56.0) | 60.6 (59.6, 61.6) | 53.4 (51.6, 55.1) |
| Living Alone | 14.8 (13.8, 15.8) | 22.1 (20.0, 24.1) | 26.0 (25.1, 26.9) | 28.5 (26.9, 30.1) |
| Living with relative | 12.6 (11.7, 13.6) | 16.1 (14.3, 17.9) | 10.6 (10.0, 11.2) | 14.7 (13.4, 15.9) |
| Other living arrangements | 5.5 (4.8, 6.2) | 8.2 (6.9, 9.6) | 2.9 (2.5, 3.2) | 3.5 (2.8, 4.1) |
| Marital Status |  |  |  |  |
| Married | 61.3 (59.9, 62.7) | 45.7 (43.3, 48.1) | 58.3 (57.3, 59.3) | 50.8 (49.1, 52.6) |
| Separated/Divorced | 23.3 (22.1, 24.5) | 32.9 (30.6, 35.2) | 11.2 (10.6, 11.9) | 16.4 (15.1, 17.7) |
| Widowed | 7.2 (6.5, 8.0) | 11.1 (9.5, 12.6) | 28.1 (27.2, 29.0) | 31.1 (29.5, 32.7) |
| Never Married | 8.0 (7.2, 8.8) | 10.1 (8.6, 11.5) | 2.3 (2.0, 2.6) | 1.6 (1.2, 2.1) |
| Marital Status Unknown | 0.2 (0.0, 0.3) | 0.3 (0.0, 0.5) | 0.1 (0.0, 0.1) | 0.0 (0.0, 0.1) |
| Smoking Status |  |  |  |  |
| Smoked, not currently | 34.8 (33.4, 36.2) | 36.2 (33.8, 38.5) | 44.7 (43.7, 45.8) | 58.8 (57.1, 60.6) |
| Current Smoker | 17.1 (16.0, 18.1) | 42.4 (40.0, 44.8) | 7.4 (6.8, 7.9) | 18.7 (17.3, 20.1) |
| Never Smoked | 48.1 (46.7, 49.6) | 21.4 (19.5, 23.4) | 47.9 (46.9, 48.9) | 22.5 (21.0, 23.9) |
| Fried |  |  |  |  |
| Robust (0) | 46.5 (45.1, 47.9) | 24.6 (22.5, 26.7) | 46.9 (45.9, 47.9) | 28.1 (26.5, 29.7) |
| Prefrail (1-2) | 47.0 (45.6, 48.5) | 52.6 (50.1, 55.0) | 44.0 (43.0, 45.1) | 50.9 (49.1, 52.7) |
| Frail (3-5) | 6.4 (5.7, 7.1) | 22.8 (20.8, 24.9) | 9.1 (8.5, 9.7) | 21.0 (19.6, 22.5) |
| BMI <18.5 | 0.5 (0.3, 0.7) | 2.1 (1.4, 2.8) | 0.9 (0.7, 1.1) | 2.1 (1.6, 2.6) |
| BMI </=21 | 4.1 (3.6, 4.7) | 6.6 (5.4, 7.8) | 5.2 (4.7, 5.6) | 8.1 (7.1, 9.1) |
| Persistent exhaustion or severe fatigue | 11.2 (10.3, 12.1) | 27.5 (25.3, 29.7) | 10.1 (9.5, 10.7) | 21.3 (19.8, 22.7) |
| Poor handgrip strength | 20.0 (18.9, 21.2) | 33.9 (31.5, 36.2) | 22.9 (22.0, 23.8) | 31.2 (29.5, 32.8) |
| Slow/poor walking speed | 24.9 (23.8, 26.1) | 44.1 (41.7, 46.6) | 30.0 (29.1, 31.0) | 49.5 (47.7, 51.3) |
| Sedentary behavior | 21.7 (20.5, 22.9) | 41.4 (38.9, 43.8) | 20.0 (19.1, 20.8) | 33.7 (32.0, 35.4) |
| Modified BODE Index |  |  |  |  |
| 0-1 | 81.1 (79.9, 82.2) | 40.6 (38.2, 43.0) | 73.4 (72.5, 74.3) | 37.9 (36.2, 39.6) |
| 2-3 | 16.6 (15.6, 17.7) | 40.2 (37.8, 42.6) | 22.4 (21.5, 23.2) | 39.4 (37.6, 41.1) |
| 4 or higher | 2.3 (1.9, 2.7) | 19.2 (17.2, 21.1) | 4.2 (3.8, 4.6) | 22.8 (21.3, 24.2) |
| BMI </=21 | 4.1 (3.6, 4.7) | 6.6 (5.4, 7.8) | 5.2 (4.7, 5.6) | 8.1 (7.1, 9.1) |
| % Pred PEF |  |  |  |  |
| >=.65 | 92.3 (91.6, 93.1) | 69.0 (66.7, 71.3) | 88.6 (88.0, 89.3) | 65.0 (63.3, 66.7) |
| 0.50 - <0.65 | 4.8 (4.2, 5.4) | 15.0 (13.2, 16.7) | 6.8 (6.3, 7.3) | 14.9 (13.6, 16.1) |
| 0.36 - <0.50 | 2.0 (1.6, 2.4) | 10.2 (8.7, 11.7) | 3.4 (3.0, 3.7) | 13.4 (12.2, 14.7) |
| <.36 | 0.8 (0.6, 1.1) | 5.9 (4.7, 7.0) | 1.2 (1.0, 1.5) | 6.7 (5.8, 7.6) |
| Shortness of breath | 16.1 (15.1, 17.2) | 64.4 (62.1, 66.7) | 21.3 (20.5, 22.2) | 65.1 (63.4, 66.8) |
| Difficulty walking one block | 8.7 (7.9, 9.5) | 32.2 (29.9, 34.5) | 14.0 (13.3, 14.7) | 34.9 (33.2, 36.6) |
| Difficulty lifting/carrying >10 lbs. | 19.0 (17.9, 20.1) | 48.7 (46.3, 51.2) | 25.1 (24.2, 26.0) | 46.9 (45.1, 48.7) |
| Cognition |  |  |  |  |
| Normal | 86.7 (85.7, 87.6) | 78.3 (76.2, 80.3) | 75.5 (74.6, 76.3) | 71.4 (69.8, 73.0) |
| Mild Impairment | 11.5 (10.6, 12.4) | 19.4 (17.5, 21.4) | 19.5 (18.7, 20.3) | 23.0 (21.5, 24.5) |
| Dementia | 1.8 (1.4, 2.2) | 2.3 (1.6, 3.1) | 5.0 (4.6, 5.5) | 5.5 (4.7, 6.4) |
| Enhanced FI-CGA |  |  |  |  |
| Relatively Fit | 23.9 (22.7, 25.1) | 5.2 (4.1, 6.3) | 11.2 (10.5, 11.8) | 2.5 (2.0, 3.1) |
| Less Fit | 32.0 (30.6, 33.3) | 13.7 (12.0, 15.4) | 27.8 (26.9, 28.7) | 14.7 (13.4, 16.0) |
| Least Fit | 28.7 (27.4, 30.0) | 29.7 (27.5, 32.0) | 38.6 (37.6, 39.6) | 38.2 (36.4, 39.9) |
| Frail | 13.2 (12.3, 14.2) | 39.4 (37.0, 41.7) | 19.7 (18.9, 20.5) | 36.4 (34.7, 38.1) |
| Most Frail | 2.1 (1.7, 2.6) | 12.0 (10.4, 13.6) | 2.7 (2.4, 3.1) | 8.2 (7.2, 9.2) |
| Reports health overall is poor | 5.3 (4.6, 5.9) | 24.2 (22.1, 26.3) | 5.3 (4.8, 5.8) | 16.4 (15.1, 17.8) |
| Dementia (from 27-item Cognition)* | 1.8 (1.4, 2.2) | 2.3 (1.6, 3.1) | 5.0 (4.6, 5.5) | 5.5 (4.7, 6.4) |
| Memory-related disease | 1.2 (0.9, 1.5) | 4.8 (3.7, 5.8) | 2.9 (2.5, 3.2) | 5.0 (4.2, 5.8) |
| Depression scale >/=3 | 22.2 (21.1, 23.4) | 46.1 (43.7, 48.6) | 17.2 (16.4, 18.0) | 30.9 (29.2, 32.5) |
| Persistent exhaustion or severe fatigue | 11.2 (10.3, 12.1) | 27.5 (25.3, 29.7) | 10.1 (9.5, 10.7) | 21.3 (19.8, 22.7) |
| Sedentary behavior | 21.7 (20.5, 22.9) | 41.4 (38.9, 43.8) | 20.0 (19.1, 20.8) | 33.7 (32.0, 35.4) |
| Impaired hearing | 1.9 (1.5, 2.3) | 6.9 (5.6, 8.1) | 6.0 (5.5, 6.5) | 9.8 (8.7, 10.8) |
| Impaired vision | 5.5 (4.9, 6.2) | 14.2 (12.5, 16.0) | 4.9 (4.4, 5.3) | 9.3 (8.3, 10.4) |
| Difficulty lifting/carrying >10 lbs. | 19.0 (17.9, 20.1) | 48.7 (46.3, 51.2) | 25.1 (24.2, 26.0) | 46.9 (45.1, 48.7) |
| Poor handgrip strength | 20.0 (18.9, 21.2) | 33.9 (31.5, 36.2) | 22.9 (22.0, 23.8) | 31.2 (29.5, 32.8) |
| Difficulty getting across a room | 4.3 (3.8, 4.9) | 14.6 (12.8, 16.3) | 5.6 (5.2, 6.1) | 12.0 (10.9, 13.2) |
| Trouble with incontinence | 18.5 (17.4, 19.6) | 31.5 (29.2, 33.7) | 27.9 (27.0, 28.8) | 37.7 (36.0, 39.4) |
| BMI </=21 | 4.1 (3.6, 4.7) | 6.6 (5.4, 7.8) | 5.2 (4.7, 5.6) | 8.1 (7.1, 9.1) |
| Difficulty bathing/showering | 3.8 (3.2, 4.3) | 15.2 (13.4, 17.0) | 5.0 (4.5, 5.5) | 13.1 (11.9, 14.3) |
| Difficulty using the toilet | 3.7 (3.1, 4.2) | 12.0 (10.4, 13.6) | 4.9 (4.5, 5.4) | 9.4 (8.4, 10.5) |
| Difficulty picking up dime | 4.3 (3.7, 4.9) | 12.6 (11.0, 14.3) | 7.2 (6.6, 7.7) | 12.7 (11.5, 13.8) |
| Difficulty with eating | 1.9 (1.5, 2.3) | 6.1 (4.9, 7.3) | 2.0 (1.7, 2.3) | 5.0 (4.2, 5.8) |
| Difficulty with dressing | 6.7 (6.0, 7.4) | 19.6 (17.7, 21.6) | 9.1 (8.5, 9.7) | 16.3 (15.0, 17.6) |
| Difficulty with preparing hot meal | 2.8 (2.4, 3.3) | 12.6 (10.9, 14.2) | 4.4 (3.9, 4.8) | 10.4 (9.3, 11.5) |
| Difficulty with grocery shopping | 6.1 (5.4, 6.8) | 22.0 (20.0, 24.0) | 6.7 (6.1, 7.2) | 16.7 (15.4, 18.1) |
| Morbidities |  |  |  |  |
| High blood pressure | 50.8 (49.4, 52.2) | 68.5 (66.2, 70.7) | 66.6 (65.6, 67.6) | 71.9 (70.3, 73.4) |
| Any heart problem (e.g. CHF, AMI) | 12.6 (11.6, 13.5) | 35.1 (32.8, 37.4) | 30.4 (29.5, 31.4) | 47.7 (45.9, 49.4) |
| Suffered stroke | 4.2 (3.6, 4.7) | 11.4 (9.8, 12.9) | 8.3 (7.7, 8.9) | 11.8 (10.7, 13.0) |
| Suffered stroke and remaining problems | 2.1 (1.7, 2.5) | 6.9 (5.6, 8.1) | 3.3 (2.9, 3.6) | 5.1 (4.3, 5.9) |
| Diabetes | 20.7 (19.6, 21.9) | 30.7 (28.4, 32.9) | 24.5 (23.6, 25.4) | 28.7 (27.1, 30.3) |
| Cancer (excl skin) | 8.8 (8.0, 9.6) | 12.8 (11.2, 14.4) | 20.5 (19.7, 21.4) | 24.2 (22.7, 25.7) |
| Arthritis or rheumatism | 45.5 (44.1, 46.9) | 72.7 (70.5, 74.9) | 68.9 (68.0, 69.9) | 83.0 (81.7, 84.3) |
| Pain limits usual activities | 22.6 (21.4, 23.8) | 55.0 (52.5, 57.4) | 19.7 (18.9, 20.6) | 36.9 (35.2, 38.6) |
| Widowed* | 2.6 (2.1, 3.0) | 3.2 (2.4, 4.1) | 5.1 (4.6, 5.6) | 5.0 (4.2, 5.8) |
| Poor/disrupted sleep | 16.8 (15.8, 17.9) | 32.8 (30.4, 35.1) | 10.7 (10.1, 11.4) | 18.0 (16.6, 19.4) |
| Difficulty getting up from chair | 34.2 (32.8, 35.5) | 65.4 (63.0, 67.7) | 41.0 (40.0, 42.1) | 56.3 (54.5, 58.1) |
| Difficulty in/out bed | 7.0 (6.3, 7.7) | 21.4 (19.3, 23.4) | 6.7 (6.2, 7.2) | 13.5 (12.3, 14.8) |
| Uses equipment/device to cross a room | 6.3 (5.6, 7.0) | 22.7 (20.7, 24.8) | 13.8 (13.1, 14.5) | 25.7 (24.2, 27.3) |
| Impaired balance | 5.3 (4.7, 6.0) | 16.9 (15.1, 18.7) | 9.3 (8.6, 9.9) | 16.8 (15.4, 18.1) |
| Difficulty with medications | 2.2 (1.8, 2.7) | 8.2 (6.9, 9.6) | 2.4 (2.1, 2.8) | 4.7 (4.0, 5.5) |
| Difficulty managing money | 4.1 (3.5, 4.7) | 11.6 (10.0, 13.2) | 4.7 (4.2, 5.1) | 7.9 (6.9, 8.9) |
| Alcohol - excessive use * | 13.5 (12.6, 14.5) | 13.1 (11.5, 14.8) | 5.7 (5.3, 6.2) | 5.6 (4.8, 6.4) |

* p-value >0.05

Individuals were matched each survey year 3:1 (Non-COPD:COPD), however within the age 65 and older group, two COPD observations could not be matched and one COPD observation was matched 1:1. The matched dataset included a total of 17,782 person-year observations for 13,200 unique individuals: 9,348 (70.8%) with 1 survey year, 3,122 (23.6%) with 2 survey years, and 730 (5.5%) with 3 survey years.

Appendix Table B-4 Outcomes in the Next Two Years, Matched Population, by Age Group

|  | **Age 50-64** | | | | **Age >65** | | | | | |
| --- | --- | --- | --- | --- | --- | --- | --- | --- | --- | --- |
|  | **Non-COPD**  **(N = 4635)** | | **COPD**  **(N = 1545)** | | **Non-COPD**  **(N = 8701)** | | | **COPD**  **(N = 2901)** | | |
|  | **%** | **95% CI** | **%** | **95% CI** | **%** | **95% CI** | **%** | | **95% CI** |
| **Mortality Next 2 Years** | 1.0 | (0.7, 1.3) | 4.9 | (3.8, 5.9) | 6.1 | (5.6, 6.6) | 13.1 | | (11.9, 14.3) |
|  | **Non-COPD**  **(N = 4587)** | | **COPD**  **(N = 1470)** | | **Non-COPD**  **(N = 8171)** | | **COPD**  **(N = 2521)** | | |
| **If Alive Next 2 Years:** | **%** | **95% CI** | **%** | **95% CI** | **%** | **95% CI** | **%** | | **95% CI** |
| **Had Inpatient Stay** |  |  |  |  |  |  |  | |  |
| **No** | 76.9 | (75.7, 78.2) | 59.5 | (56.8, 62.2) | 67.2 | (66.2, 68.2) | 51.3 | | (49.2, 53.3) |
| **Yes** | **15.4** | **(14.3, 16.4)** | **34.1** | **(31.5, 36.7)** | **27.8** | **(26.8, 28.8)** | **43.8** | | **(41.7, 45.8)** |
| **Missing** | 7.7 | (6.9, 8.4) | 6.4 | (5.1, 7.6) | 5.0 | (4.5, 5.5) | 5.0 | | (4.1, 5.8) |
| Moved to Nursing Home |  |  |  |  |  |  |  | |  |
| No | 98.3 | (97.9, 98.6) | 97.1 | (96.3, 98.0) | 97.3 | (97.0, 97.7) | 97.1 | | (96.5, 97.8) |
| Yes | **0.0** | **(0.0, 0.1)** | **0.6** | **(0.2, 1.1)** | **1.9** | **(1.6, 2.2)** | **1.8** | | **(1.3, 2.3)** |
| Missing | 1.7 | (1.3, 2.1) | 2.2 | (1.5, 3.0) | 0.8 | (0.6, 1.0) | 1.1 | | (0.7, 1.5) |
| Had Nursing Home Stay |  |  |  |  |  |  |  | |  |
| No | 91.6 | (90.8, 92.4) | 90.5 | (89.0, 92.0) | 89.7 | (89.0, 90.3) | 87.2 | | (85.9, 88.6) |
| Yes | **0.8** | **(0.5, 1.1)** | **3.3** | **(2.4, 4.3)** | **5.4** | **(4.9, 5.9)** | **8.0** | | **(6.9, 9.1)** |
| Missing | 7.6 | (6.8, 8.4) | 6.2 | (5.0, 7.4) | 4.9 | (4.4, 5.4) | 4.8 | | (3.9, 5.6) |
| Had Home Health |  |  |  |  |  |  |  | |  |
| No | 88.8 | (87.9, 89.7) | 81.9 | (79.9, 83.9) | 85.1 | (84.3, 85.9) | 76.8 | | (75.0, 78.5) |
| Yes | **3.6** | **(3.0, 4.1)** | **11.7** | **(10.0, 13.4)** | **10.0** | **(9.4, 10.7)** | **18.6** | | **(17.0, 20.2)** |
| Missing | 7.7 | (6.9, 8.4) | 6.4 | (5.1, 7.6) | 4.8 | (4.4, 5.3) | 4.7 | | (3.8, 5.5) |
| **Nursing or HH** |  |  |  |  |  |  |  | |  |
| **No** | 88.3 | (87.3, 89.2) | 80.4 | (78.3, 82.5) | 82.4 | (81.6, 83.2) | 72.7 | | (71.0, 74.5) |
| **Yes** | **4.0** | **(3.5, 4.6)** | **13.2** | **(11.4, 15.0)** | **12.6** | **(11.9, 13.3)** | **22.4** | | **(20.7, 24.1)** |
| **Missing** | 7.7 | (6.9, 8.5) | 6.4 | (5.1, 7.6) | 5.0 | (4.5, 5.4) | 4.9 | | (4.0, 5.7) |

HH, home health

Appendix Table B-5 Odds Ratios, Mortality Next 2 Years, Stratified by COPD

|  | Non-COPD | | | | COPD | | | |
| --- | --- | --- | --- | --- | --- | --- | --- | --- |
|  | **Age 50-64** | | **Age >65** | | **Age 50-64** | | **Age >65** | |
|  | **OR (95% CI)** | **P-value** | **OR (95% CI)** | **P-value** | **OR (95% CI)** | **P-value** | **OR (95% CI)** | **P-value** |
| Fried Frailty Index (reference = Robust) | | | | | | | | |
| Unadjusted |  |  |  |  |  |  |  |  |
| Prefrail | 2.8 (1.29, 5.94) | 0.009 | 2.9 (2.28, 3.62) | <.0001 | 2.7 (1.13, 6.56) | 0.03 | 3.3 (2.22, 4.94) | <.0001 |
| Frail | 11.8 (5.05, 27.41) | <.0001 | 10.0 (7.70, 12.94) | <.0001 | 6.9 (2.84, 16.56) | <.0001 | 11.3 (7.53, 16.93) | <.0001 |
| AUC for model | 0.693 |  | 0.662 |  | 0.694 |  | 0.705 |  |
| Adjusted1 |  |  |  |  |  |  |  |  |
| Prefrail | 2.5 (1.12, 5.45) | 0.02 | 2.8 (2.22, 3.55) | <.0001 | 2.4 (1.00, 5.88) | 0.049 | 3.3 (2.20, 4.92) | <.0001 |
| Frail | 9.7 (3.94, 24.09) | <.0001 | 9.5 (7.26, 12.45) | <.0001 | 5.5 (2.24, 13.66) | 0.0002 | 11.3 (7.48, 17.13) | <.0001 |
| AUC for model | 0.776 |  | 0.723 |  | 0.722 |  | 0.735 |  |
| Adjusted2 |  |  |  |  |  |  |  |  |
| Prefrail | 2.0 (0.90, 4.46) | 0.09 | 2.7 (2.14, 3.45) | <.0001 | 2.3 (0.93, 5.93) | 0.07 | 3.4 (2.26, 5.13) | <.0001 |
| Frail | 6.0 (2.12, 17.24) | 0.0008 | 8.6 (6.40, 11.63) | <.0001 | 5.1 (1.84, 13.85) | 0.002 | 12.7 (8.20, 19.67) | <.0001 |
| AUC for model | 0.853 |  | 0.753 |  | 0.772 |  | 0.761 |  |
| Enhanced FI-CGA (reference = Relatively Fit) | | | | | | | | |
| Unadjusted |  |  |  |  |  |  |  |  |
| Less Fit | 2.2 (0.45, 11.12) | 0.32 | 1.0 (0.64, 1.68) | 0.87 | 0.8 (0.07, 8.45) | 0.82 | 1.1 (0.34, 3.86) | 0.83 |
| Least Fit | 8.0 (1.86, 34.33) | 0.005 | 2.2 (1.45, 3.43) | 0.0003 | 3.2 (0.42, 24.61) | 0.26 | 2.4 (0.75, 7.48) | 0.14 |
| Frail | 11.9 (2.69, 53.04) | 0.001 | 5.9 (3.81, 9.01) | <.0001 | 4.5 (0.61, 33.77) | 0.14 | 5.2 (1.65, 16.27) | 0.005 |
| Most Frail | 48.5 (10.16, 231.92) | <.0001 | 9.0 (5.36, 15.16) | <.0001 | 10.1 (1.32, 76.40) | 0.03 | 8.4 (2.61, 27.07) | 0.0004 |
| AUC for model | 0.747 |  | 0.686 |  | 0.656 |  | 0.654 |  |
| Adjusted1 |  |  |  |  |  |  |  |  |
| Less Fit | 2.2 (0.43, 10.85) | 0.35 | 1.0 (0.62, 1.62) | 0.99 | 0.8 (0.07, 8.28) | 0.83 | 1.1 (0.33, 3.74) | 0.86 |
| Least Fit | 7.2 (1.60, 32.33) | 0.01 | 2.1 (1.37, 3.26) | 0.0008 | 3.1 (0.42, 22.62) | 0.27 | 2.3 (0.72, 7.12) | 0.16 |
| Frail | 10.0 (2.04, 48.72) | 0.004 | 5.4 (3.45, 8.31) | <.0001 | 3.7 (0.51, 27.26) | 0.20 | 5.0 (1.60, 15.58) | 0.006 |
| Most Frail | 40.8 (7.61, 218.38) | <.0001 | 8.6 (5.03, 14.63) | <.0001 | 8.3 (1.09, 62.42) | 0.04 | 8.2 (2.56, 26.49) | 0.0004 |
| AUC for model | 0.795 |  | 0.712 |  | 0.708 |  | 0.692 |  |
| Proxy BODE Score (reference = score 0-1) | | | | | | | | |
| Unadjusted |  |  |  |  |  |  |  |  |
| 2-3 | 3.5 (1.88, 6.56) | <.0001 | 2.9 (2.42, 3.57) | <.0001 | 2.3 (1.09, 4.65) | 0.03 | 2.8 (2.07, 3.90) | <.0001 |
| 4 or higher | 10.9 (4.59, 25.83) | <.0001 | 7.8 (5.93, 10.18) | <.0001 | 8.8 (4.42, 17.37) | <.0001 | 6.6 (4.81, 9.09) | <.0001 |
| AUC for model | 0.665 |  | 0.659 |  | 0.717 |  | 0.684 |  |
| Adjusted1 |  |  |  |  |  |  |  |  |
| 2-3 | 3.0 (1.60, 5.59) | 0.0006 | 2.8 (2.32, 3.45) | <.0001 | 1.9 (0.92, 3.94) | 0.08 | 2.8 (2.00, 3.83) | <.0001 |
| 4 or higher | 9.4 (3.72, 23.71) | <.0001 | 7.0 (5.30, 9.35) | <.0001 | 7.2 (3.46, 14.79) | <.0001 | 6.0 (4.30, 8.31) | <.0001 |
| AUC for model | 0.770 |  | 0.694 |  | 0.753 |  | 0.711 |  |
| Adjusted2 |  |  |  |  |  |  |  |  |
| 2-3 | 2.3 (1.09, 4.88) | 0.03 | 2.6 (2.12, 3.27) | <.0001 | 1.8 (0.83, 3.76) | 0.14 | 2.6 (1.86, 3.64) | <.0001 |
| 4 or higher | 7.1 (2.50, 20.33) | 0.0002 | 6.5 (4.77, 8.88) | <.0001 | 6.4 (2.99, 13.63) | <.0001 | 5.9 (4.17, 8.28) | <.0001 |
| AUC for model | 0.836 |  | 0.734 |  | 0.802 |  | 0.739 |  |

AUC, area under the receiver operating characteristic curve; CI, confidence interval; COPD, chronic obstructive pulmonary disease

1 Models adjusted for education level, living arrangements, marital status, and smoking status

2 Beyond adjustment for factors in footnote 1, Fried and Proxy BODE additionally adjusted for arthritis, cancer, diabetes, heart condition, hypertension, pain limitation, stroke effects

Appendix Table B-6 Odds Ratios, Inpatient Stay Next 2 Years, Stratified by COPD

|  | Non-COPD | | | | | | COPD | | | | |
| --- | --- | --- | --- | --- | --- | --- | --- | --- | --- | --- | --- |
|  | **Age 50-64** | | | **Age >65** | | | **Age 50-64** | | | **Age >65** | |
|  | **OR (95% CI)** | **P-value** | **OR (95% CI)** | | **P-value** | **OR (95% CI)** | | **P-value** | **OR (95% CI)** | | **P-value** |
| Fried Frailty Index (reference = Robust) | | | | | | | | | | | |
| Unadjusted |  |  |  | |  |  | |  |  | |  |
| Prefrail | 1.7 (1.40, 2.00) | <.0001 | 1.6 (1.43, 1.76) | | <.0001 | 2.1 (1.60, 2.85) | | <.0001 | 1.5 (1.28, 1.87) | | <.0001 |
| Frail | 4.4 (3.32, 5.87) | <.0001 | 3.1 (2.56, 3.67) | | <.0001 | 3.8 (2.66, 5.33) | | <.0001 | 2.5 (1.98, 3.24) | | <.0001 |
| AUC for model | 0.599 |  | 0.581 | |  | 0.614 | |  | 0.58 | |  |
| Adjusted1 |  |  |  | |  |  | |  |  | |  |
| Prefrail | 1.6 (1.35, 1.93) | <.0001 | 1.6 (1.43, 1.77) | | <.0001 | 2.1 (1.59, 2.87) | | <.0001 | 1.6 (1.29, 1.88) | | <.0001 |
| Frail | 4.1 (3.05, 5.48) | <.0001 | 3.1 (2.55, 3.67) | | <.0001 | 3.7 (2.60, 5.34) | | <.0001 | 2.5 (1.93, 3.21) | | <.0001 |
| AUC for model | 0.624 |  | 0.589 | |  | 0.641 | |  | 0.599 | |  |
| Adjusted2 |  |  |  | |  |  | |  |  | |  |
| Prefrail | 1.3 (1.12, 1.62) | 0.0019 | 1.4 (1.25, 1.56) | | <.0001 | 1.7 (1.23, 2.26) | | 0.001 | 1.4 (1.14, 1.69) | | 0.001 |
| Frail | 2.2 (1.62, 3.10) | <.0001 | 2.2 (1.77, 2.64) | | <.0001 | 2.4 (1.60, 3.47) | | <.0001 | 2.0 (1.52, 2.60) | | <.0001 |
| AUC for model | 0.701 |  | 0.642 | |  | 0.708 | |  | 0.637 | |  |
| Enhanced FI-CGA (reference = Relatively Fit) | | | | | | | | | | | |
| Unadjusted |  |  |  | |  |  | |  |  | |  |
| Less Fit | 2.2 (1.64, 3.05) | <.0001 | 1.6 (1.34, 2.03) | | <.0001 | 1.2 (0.55, 2.60) | | 0.66 | 1.7 (0.93, 3.20) | | 0.08 |
| Least Fit | 4.1 (3.02, 5.49) | <.0001 | 2.6 (2.11, 3.16) | | <.0001 | 2.6 (1.28, 5.22) | | 0.008 | 2.8 (1.55, 5.00) | | 0.0006 |
| Frail | 8.6 (6.26, 11.81) | <.0001 | 4.6 (3.68, 5.64) | | <.0001 | 5.3 (2.64, 10.71) | | <.0001 | 4.1 (2.29, 7.46) | | <.0001 |
| Most Frail | 14.7 (8.94, 24.17) | <.0001 | 8.1 (5.63, 11.54) | | <.0001 | 10.4 (4.86, 22.20) | | <.0001 | 5.8 (2.99, 11.25) | | <.0001 |
| AUC for model | 0.689 |  | 0.627 | |  | 0.673 | |  | 0.599 | |  |
| Adjusted1 |  |  |  | |  |  | |  |  | |  |
| Less Fit | 2.2 (1.64, 3.06) | <.0001 | 1.7 (1.34, 2.04) | | <.0001 | 1.2 (0.54, 2.59) | | 0.67 | 1.7 (0.90, 3.10) | | 0.10 |
| Least Fit | 4.0 (2.99, 5.49) | <.0001 | 2.6 (2.14, 3.20) | | <.0001 | 2.7 (1.32, 5.43) | | 0.007 | 2.7 (1.50, 4.83) | | 0.0009 |
| Frail | 8.8 (6.31, 12.24) | <.0001 | 4.7 (3.77, 5.81) | | <.0001 | 5.5 (2.72, 11.27) | | <.0001 | 4.1 (2.25, 7.34) | | <.0001 |
| Most Frail | 15.1 (8.99, 25.50) | <.0001 | 8.4 (5.82, 11.99) | | <.0001 | 11.7 (5.35, 25.78) | | <.0001 | 5.9 (3.01, 11.53) | | <.0001 |
| AUC for model | 0.699 |  | 0.632 | |  | 0.697 | |  | 0.619 | |  |
| Proxy BODE Score (reference = score 0-1) | | | | | | | | | | | |
| Unadjusted |  |  |  | |  |  | |  |  | |  |
| 2-3 | 1.9 (1.67, 2.11) | <.0001 | 2.4 (1.85, 3.12) | | <.0001 | 1.9 (1.67, 2.11) | | <.0001 | 2.4 (1.85, 3.12) | | <.0001 |
| 4 or higher | 2.7 (2.08, 3.46) | <.0001 | 2.9 (2.12, 4.11) | | <.0001 | 2.7 (2.08, 3.46) | | <.0001 | 2.9 (2.12, 4.11) | | <.0001 |
| AUC for model | 0.588 |  | 0.567 | |  | 0.618 | |  | 0.594 | |  |
| Adjusted1 |  |  |  | |  |  | |  |  | |  |
| 2-3 | 2.4 (1.97, 2.92) | <.0001 | 1.9 (1.67, 2.11) | | <.0001 | 2.4 (1.84, 3.17) | | <.0001 | 2.0 (1.66, 2.42) | | <.0001 |
| 4 or higher | 3.7 (2.42, 5.74) | <.0001 | 2.7 (2.06, 3.46) | | <.0001 | 2.8 (2.01, 4.02) | | <.0001 | 2.2 (1.77, 2.85) | | <.0001 |
| AUC for model | 0.617 |  | 0.578 | |  | 0.644 | |  | 0.615 | |  |
| Adjusted2 |  |  |  | |  |  | |  |  | |  |
| 2-3 | 1.6 (1.31, 2.04) | <.0001 | 1.5 (1.32, 1.70) | | <.0001 | 1.9 (1.43, 2.57) | | <.0001 | 1.8 (1.45, 2.15) | | <.0001 |
| 4 or higher | 2.2 (1.41, 3.56) | 0.0006 | 2.0 (1.55, 2.66) | | <.0001 | 2.2 (1.52, 3.15) | | <.0001 | 2.0 (1.59, 2.59) | | <.0001 |
| AUC for model | 0.701 |  | 0.638 | |  | 0.712 | |  | 0.648 | |  |

AUC, area under the receiver operating characteristic curve; CI, confidence interval; COPD, chronic obstructive pulmonary disease

1 Models adjusted for education level, living arrangements, marital status, and smoking status

2 Beyond adjustment for factors in footnote 1, Fried and Proxy BODE additionally adjusted for arthritis, cancer, diabetes, heart condition, hypertension, pain limitation, stroke effects

Appendix Table B-7 Odds Ratios, Nursing Care, or Home Health Next 2 Years, Stratified by COPD

|  | Non-COPD | | | | | | COPD | | | | |
| --- | --- | --- | --- | --- | --- | --- | --- | --- | --- | --- | --- |
|  | **Age 50-64** | | | **Age >65** | | | **Age 50-64** | | | **Age >65** | |
|  | **OR (95% CI)** | **P-value** | **OR (95% CI)** | | **P-value** | **OR (95% CI)** | | **P-value** | **OR (95% CI)** | | **P-value** |
| Fried Frailty Index (reference = Robust) | | | | | | | | | | | |
| Unadjusted |  |  |  | |  |  | |  |  | |  |
| Prefrail | 2.5 (1.75, 3.63) | <.0001 | 2.5 (2.13, 2.89) | | <.0001 | 2.8 (1.73, 4.59) | | <.0001 | 2.3 (1.77, 2.95) | | <.0001 |
| Frail | 8.5 (5.45, 13.24) | <.0001 | 7.1 (5.79, 8.79) | | <.0001 | 5.4 (3.21, 9.17) | | <.0001 | 4.5 (3.35, 6.11) | | <.0001 |
| AUC for model | 0.663 |  | 0.656 | |  | 0.637 | |  | 0.630 | |  |
| Adjusted1 |  |  |  | |  |  | |  |  | |  |
| Prefrail | 2.2 (1.56, 3.24) | <.0001 | 2.4 (2.07, 2.83) | | <.0001 | 2.7 (1.65, 4.55) | | 0.0001 | 2.2 (1.70, 2.85) | | <.0001 |
| Frail | 6.5 (4.11, 10.23) | <.0001 | 6.7 (5.36, 8.25) | | <.0001 | 5.1 (2.87, 8.99) | | <.0001 | 4.1 (3.01, 5.58) | | <.0001 |
| AUC for model | 0.712 |  | 0.683 | |  | 0.697 | |  | 0.665 | |  |
| Adjusted2 |  |  |  | |  |  | |  |  | |  |
| Prefrail | 1.9 (1.28, 2.70) | 0.001 | 2.2 (1.84, 2.54) | | <.0001 | 2.0 (1.21, 3.46) | | 0.008 | 2.0 (1.55, 2.63) | | <.0001 |
| Frail | 3.6 (2.24, 5.83) | <.0001 | 4.9 (3.88, 6.20) | | <.0001 | 2.9 (1.60, 5.28) | | 0.0004 | 3.5 (2.56, 4.85) | | <.0001 |
| AUC for model | 0.760 |  | 0.705 | |  | 0.754 | |  | 0.678 | |  |
| Adjusted3 |  |  |  | |  |  | |  |  | |  |
| Prefrail | 1.8 (1.23, 2.61) | 0.002 | 2.1 (1.77, 2.44) | | <.0001 | 2.1 (1.24, 3.57) | | 0.006 | 1.9 (1.47, 2.51) | | <.0001 |
| Frail | 2.9 (1.78, 4.81) | <.0001 | 4.2 (3.32, 5.37) | | <.0001 | 2.9 (1.60, 5.31) | | 0.0005 | 3.1 (2.25, 4.36) | | <.0001 |
| AUC for model | 0.768 |  | 0.709 | |  | 0.756 | |  | 0.685 | |  |
| Enhanced FI-CGA (reference = Relatively Fit) | | | | | | | | | | | |
| Unadjusted |  |  |  | |  |  | |  |  | |  |
| Less Fit | 1.9 (0.95, 3.87) | 0.07 | 1.9 (1.32, 2.87) | | 0.0008 | 4.6 (0.58, 35.91) | | 0.15 | 2.8 (0.87, 9.02) | | 0.08 |
| Least Fit | 4.1 (2.13, 7.97) | <.0001 | 4.2 (2.89, 6.04) | | <.0001 | 4.0 (0.53, 30.41) | | 0.18 | 4.6 (1.47, 14.45) | | 0.009 |
| Frail | 12.0 (6.29, 22.95) | <.0001 | 9.7 (6.65, 14.00) | | <.0001 | 17.9 (2.44, 130.98) | | 0.005 | 9.5 (3.02, 29.60) | | 0.0001 |
| Most Frail | 43.9 (20.89, 92.19) | <.0001 | 28.1 (17.67, 44.63) | | <.0001 | 38.2 (5.13, 283.62) | | 0.0004 | 20.7 (6.40, 66.72) | | <.0001 |
| AUC for model | 0.751 |  | 0.696 | |  | 0.718 | |  | 0.655 | |  |
| Adjusted |  |  |  | |  |  | |  |  | |  |
| Less Fit | 1.9 (0.92, 3.77) | 0.08 | 1.9 (1.28, 2.81) | | 0.001 | 4.5 (0.57, 35.80) | | 0.15 | 2.7 (0.82, 8.68) | | 0.10 |
| Least Fit | 4.0 (2.06, 7.69) | <.0001 | 4.1 (2.81, 5.89) | | <.0001 | 4.3 (0.56, 33.07) | | 0.16 | 4.3 (1.36, 13.57) | | 0.01 |
| Frail | 11.3 (5.83, 21.91) | <.0001 | 9.2 (6.32, 13.43) | | <.0001 | 19.6 (2.62, 146.87) | | 0.004 | 8.6 (2.72, 27.05) | | 0.0002 |
| Most Frail | 39.9 (18.31, 86.95) | <.0001 | 28.7 (17.94, 45.87) | | <.0001 | 46.0 (5.97, 354.86) | | 0.0002 | 19.4 (5.94, 63.13) | | <.0001 |
| AUC for model | 0.769 |  | 0.711 | |  | 0.758 | |  | 0.674 | |  |
| Proxy BODE Score (reference = score 0-1) | | | | | | | | | | | |
| Unadjusted |  |  |  | |  |  | |  |  | |  |
| 2-3 | 3.9 (2.83, 5.42) | <.0001 | 2.7 (2.33, 3.11) | | <.0001 | 3.5 (2.32, 5.29) | | <.0001 | 2.3 (1.85, 2.96) | | <.0001 |
| 4 or higher | 11.2 (6.81, 18.58) | <.0001 | 5.0 (3.79, 6.54) | | <.0001 | 5.8 (3.67, 9.14) | | <.0001 | 3.5 (2.67, 4.54) | | <.0001 |
| AUC for model | 0.667 |  | 0.619 | |  | 0.671 | |  | 0.629 | |  |
| Adjusted1 |  |  |  | |  |  | |  |  | |  |
| Prefrail | 3.5 (2.52, 4.91) | <.0001 | 2.7 (2.29, 3.08) | | <.0001 | 3.6 (2.36, 5.56) | | <.0001 | 2.3 (1.77, 2.86) | | <.0001 |
| Frail | 9.8 (5.89, 16.33) | <.0001 | 4.9 (3.68, 6.49) | | <.0001 | 6.1 (3.72, 9.86) | | <.0001 | 3.6 (2.70, 4.69) | | <.0001 |
| AUC for model | 0.707 |  | 0.654 | |  | 0.701 | |  | 0.656 | |  |
| Adjusted2 |  |  |  | |  |  | |  |  | |  |
| 2-3 | 2.3 (1.56, 3.28) | <.0001 | 2.1 (1.78, 2.46) | | <.0001 | 2.4 (1.52, 3.78) | | 0.0002 | 2.0 (1.56, 2.56) | | <.0001 |
| 4 or higher | 5.7 (3.27, 9.85) | <.0001 | 3.8 (2.82, 5.07) | | <.0001 | 4.0 (2.45, 6.71) | | <.0001 | 3.3 (2.50, 4.41) | | <.0001 |
| AUC for model | 0.765 |  | 0.687 | |  | 0.765 | |  | 0.686 | |  |
| Adjusted3 |  |  |  | |  |  | |  |  | |  |
| 2-3 | 2.1 (1.41, 3.00) | 0.0002 | 1.9 (1.65, 2.28) | | <.0001 | 2.4 (1.52, 3.82) | | 0.0002 | 1.8 (1.44, 2.38) | | <.0001 |
| 4 or higher | 4.8 (2.71, 8.54) | <.0001 | 3.3 (2.48, 4.49) | | <.0001 | 4.1 (2.44, 6.80) | | <.0001 | 3.1 (2.30, 4.06) | | <.0001 |
| AUC for model | 0.773 |  | 0.693 | |  | 0.767 | |  | 0.692 | |  |

AUC, area under the receiver operating characteristic curve; CI, confidence interval; COPD, chronic obstructive pulmonary disease

1 Models adjusted for education level, living arrangements, marital status, and smoking status

2 Beyond adjustment for factors in footnote 1, Fried and Proxy BODE additionally adjusted for: arthritis, cancer, diabetes, heart condition, hypertension, pain limitation, stroke effects

3 Beyond adjustment for factors in footnote 1, Fried and Proxy BODE additionally adjusted for: impaired vision, difficulty with picking up a dime, and difficulty with dressing

References

1.Lohman MC, Sonnega AJ, Resciniti NV, Leggett AN. Frailty phenotype and cause-specific mortality in the us. *J Gerontol A Biol Sci Med Sci* 2020;75(10):1935-1942.

2.Rockwood K, Song X, Mitnitski A. Changes in relative fitness and frailty across the adult lifespan: Evidence from the Canadian national population health survey. *CMAJ* 2011;183(8):E487-494.

3.Roberts MH, Mapel DW. Limited lung function: Impact of reduced peak expiratory flow on health status, health-care utilization, and expected survival in older adults. *Am J Epidemiol* 2012;176(2):127-134.

1. In the study by Fried et al., 17% of the study population met exhaustion criteria. In the HRS 2006 study population, if a response to either is used, 31.1% of Non-COPD and 47.1% of COPD are characterized as meeting the exhaustion criteria, while if a Yes response to *both* is the criterion, the percentages are 11.2% of Non-COPD and 21.0% of COPD. An additional HRS question, “Have you had any of the following persistent or troublesome problems? Severe fatigue or exhaustion?” was investigated, but this question was only used every other survey year. [↑](#footnote-ref-1)
2. Self-report of gastrointestinal problems (using response for medications for stomach problems), back pain, and headaches were also considered, but these questions were not asked each survey year. [↑](#footnote-ref-2)
3. PEF performed using a Mini-Wright Peak Flow Meter (Clement Clarke International Ltd., Harlow, United Kingdom) with a disposable mouthpiece (3 measurements 30 seconds apart, maximum measurement used); percentage of predicted value for PEF determined based on individual’s age, gender, height, and race/ethnicity [Complete at least one breath test] [↑](#footnote-ref-3)
